# Supplementary material for: Effect of Polystyrene Synthesis Method on Water Sorption and Glass Transition
Source: Membranes (Basel). 2022 Oct 28;12(11):1059. doi: 10.3390/membranes12111059 (PMC9692681; doi:10.3390/membranes12111059)
Supplement: Supplementary file 1 [file membranes-12-01059-s001.zip › Sorption_Diffusion_SIData.xlsx]

## Sheet: 35°C
PS387k - custom								SEO92k - cylindrical								SEO122k - lamellar								PS77k - Polymer Source								PS160k - Polymer Source								PS109k - Versalis
p	a	W	w	<a>	<w>	D		p	a	W	w	<a>	<w>	D		p	a	W	w	<a>	<w>	D		p	a	W	w	<a>	<w>	D		p	a	W	w	<a>	<w>	D		p	a	W	w	<a>	<w>	D
mbar		g/gpol				cm2/s		mbar		g/gpol				cm2/s		mbar		g/gpol				cm2/s		mbar		g/gpol				cm2/s		mbar		g/gpol				cm2/s		mbar		g/gpol				cm2/s
0	0	0	0					0	0	0	0					0	0	0	0					0	0	0	0					0	0	0	0					0	0	0	0
8.3	0.147976	0.000520956	0.000520685	0.0739882	0.000260342	1.5e-07		5.4	0.0962738	0.000702904	0.00070241	0.0481369	0.000351205	1.57621e-07		6	0.106971	0.000609154	0.000608783	0.0534855	0.000304391	1.21557e-07		7.00489	0.125043	0.000339763	0.000339647	0.0625213	0.000169824	4.5e-08		6.83328	0.121979	0.000319214	0.000319112	0.0609896	0.000159556	5.5e-08		10.2	0.181851	0.000138714	0.000138694	0.0909253	6.93472e-05	6e-07
19.45	0.346764	0.00114889	0.00114757	0.24737	0.000834129	1.4e-07		12.2	0.217508	0.00157957	0.00157708	0.156891	0.00113974	1.18216e-07		12.8	0.228205	0.00135206	0.00135023	0.167588	0.000979508	1.08051e-07		18.3668	0.327861	0.000695292	0.000694809	0.226452	0.000517228	5e-08		19.6857	0.351404	0.000625053	0.000624663	0.236692	0.000471888	5.5e-08		29.6	0.527723	0.000257553	0.000257487	0.354787	0.000198091	6e-07
30.75	0.548226	0.00171077	0.00170785	0.447495	0.00142771	1.4e-07		19.7	0.351221	0.00294422	0.00293558	0.284364	0.00225633	9.8513e-08		20.3	0.361918	0.00261325	0.00260644	0.295062	0.00197834	1.13453e-07		34.1382	0.609393	0.00114631	0.001145	0.468627	0.000919903	5e-08		38.0047	0.678413	0.00105046	0.00104936	0.514909	0.00083701	6.5e-08		48.1	0.85755	0.000507867	0.00050761	0.692637	0.000382548	1e-07
41.95	0.747905	0.00212369	0.00211918	0.648066	0.00191352	1.4e-07		0	0	0	0					0	0	0	0					0	0	0	0					0	0	0	0					0	0	0	0
0	0	0	0					2.7	0.0481369	0.0002574	0.000257334	0.0240685	0.000128667	1.77323e-07		2.2	0.0392227	0.000199855	0.000199815	0.0196113	9.99075e-05	1.4857e-07		6.88556	0.122913	0.000306476	0.000306382	0.0614563	0.000153191	4.2e-08		7.07661	0.126323	0.000278391	0.000278313	0.0631615	0.000139157	5.5e-08		16.15	0.287009	0.000164181	0.000164154	0.143505	8.20771e-05	3.25e-07
4.4	0.0784454	0.000264437	0.000264367	0.0392227	0.000132183	1.6e-07		0	0	0	0					0	0	0	0					18.5046	0.330321	0.000657395	0.000656963	0.226617	0.000481673	5e-08		19.425	0.346751	0.000541821	0.000541528	0.236537	0.000409921	6e-08		17.05	0.303976	0.000184367	0.000184333	0.295492	0.000174244	4e-07
12.9	0.229988	0.000728026	0.000727496	0.154216	0.000495931	1.5e-07		16.35	0.291496	0.00220748	0.00220262	0.145748	0.00110131	1.18216e-07		18.6	0.33161	0.00228237	0.00227717	0.165805	0.00113859	1.29661e-07		34.7808	0.620864	0.00112232	0.00112106	0.475593	0.000889014	5e-08		38.4774	0.686851	0.000950006	0.000949105	0.516801	0.000745316	6.5e-08		28.65	0.510786	0.000273577	0.000273502	0.407381	0.000228917	5e-07
21.65	0.385987	0.00120215	0.00120071	0.307987	0.000964103	1.5e-07		28.8	0.513461	0.00498663	0.00496189	0.402478	0.00358226	7.48699e-08		30.6	0.545552	0.00525913	0.00523161	0.438581	0.00375439	7.56354e-08																		29.45	0.523369	0.000243231	0.000243172	0.517078	0.000258337	3.5e-07
32.2	0.574077	0.0017061	0.00170319	0.480032	0.00145195	1.5e-07		36	0.641826	0.00759901	0.0075417	0.577643	0.0062518	5.51673e-08		36	0.641826	0.0078858	0.0078241	0.593689	0.00652786	6.48303e-08
44	0.784454	0.00213772	0.00213316	0.679265	0.00191818	1.4e-07		0	0	0	0					0	0	0	0
								4.3	0.0766625	0.000530085	0.000529805	0.0383313	0.000264902	1.57621e-07		4.55	0.0811196	0.000573573	0.000573244	0.0405598	0.000286622
								10.8	0.192548	0.0013425	0.0013407	0.134605	0.00093525	1.18216e-07		12.35	0.220182	0.00146086	0.00145873	0.150651	0.00101599	1.29661e-07
								20.9	0.372615	0.00299951	0.00299054	0.282582	0.00216562	9.8513e-08		22.2	0.395792	0.0032036	0.00319337	0.307987	0.00232605	1.16154e-07
								33	0.58834	0.00594348	0.00590836	0.480478	0.00444945	7.09294e-08		33.25	0.592797	0.00606351	0.00602697	0.494295	0.00461017	6.75316e-08
								38.9	0.693528	0.00839035	0.00832053	0.640934	0.00711445	4.72863e-08		39.6	0.706008	0.00919223	0.00910851	0.649403	0.00756774	5.40253e-08

## Sheet: 45°C
PS387k - custom								SEO92k - cylindrical								SEO122k - lamellar								PS77k - Polymer Source								PS160k - Polymer Source								PS109k - Versalis
p	a	W	w	<a>	<w>	D		p	a	W	w	<a>	<w>	D		p	a	W	w	<a>	<w>	D		p	a	W	w	<a>	<w>	D		p	a	W	w	<a>	<w>	D		p	a	W	w	<a>	<w>	D
mbar		g/gpol				cm2/s		mbar		g/gpol				cm2/s		mbar		g/gpol				cm2/s		mbar		g/gpol				cm2/s		mbar		g/gpol				cm2/s		mbar		g/gpol				cm2/s
0	0	0	0					0	0	0	0					0	0	0	0																					0	0	0	0
3.95	0.0417526	0.000174022	0.000173992	0.0208763	8.69959e-05	2e-07		5.1	0.0539084	0.00039838	0.000398221	0.0269542	0.000199111	2.16729e-07		5.2	0.0549654	0.000364052	0.000363919	0.0274827	0.00018196	2.29607e-07																		8.75142	0.0912557	8.62416e-05	8.62342e-05	0.0456279	4.31171e-05	5e-07
12.45	0.1316	0.000476462	0.000476235	0.0866762	0.000325113	2.1e-07			0	0	0					0	0	0	0																					9.25581	0.0965152	0.000108778	0.000108767	0.0938855	9.75004e-05	6.5e-07
21.95	0.232017	0.000806984	0.000806334	0.181809	0.000641284	2.1e-07		6.9	0.0729348	0.000544343	0.000544047	0.0364674	0.000272023	2.56134e-07		7.2	0.0761059	0.000499128	0.000498879	0.038053	0.000249439	2.16101e-07																		15.4074	0.160661	0.000143159	0.000143139	0.128588	0.000125953	5e-07
32.25	0.340891	0.00115742	0.00115609	0.286454	0.00098121	2.1e-07		19.1	0.201892	0.00147798	0.0014758	0.137413	0.00100992	1.97026e-07		19.05	0.201364	0.00139827	0.00139632	0.138735	0.000947598	2.10699e-07																		25.6213	0.267166	0.000193239	0.000193202	0.213914	0.00016817	5.5e-07
41.55	0.439195	0.00146704	0.00146489	0.390043	0.00131049	2.1e-07		29.4	0.310766	0.00242961	0.00242372	0.256329	0.00194976	1.89145e-07		29.9	0.316051	0.00254319	0.00253674	0.258707	0.00196653	1.94491e-07																		29.5551	0.308186	0.000228982	0.00022893	0.287676	0.000211066	5e-07
51.95	0.549125	0.00179607	0.00179285	0.49416	0.00162887	2.1e-07		43	0.454521	0.00422578	0.004208	0.382644	0.00331586	1.18216e-07		44.2	0.467206	0.00488599	0.00486223	0.391628	0.00369949	1.67478e-07																		30.7353	0.320494	0.000242956	0.000242897	0.31434	0.000235913	5e-07
63.25	0.668569	0.00212998	0.00212545	0.608847	0.00195915	2.1e-07		53.2	0.562338	0.0064497	0.00640837	0.50843	0.00530819	9.8513e-08		53.3	0.563395	0.00757172	0.00751482	0.5153	0.00618853	1.35063e-07																		39.8131	0.415153	0.000285073	0.000284991	0.367823	0.000263944	8e-07
75.3	0.795941	0.00236068	0.00235512	0.732255	0.00224029	2.1e-07		66.4	0.701866	0.0108603	0.0107436	0.632102	0.00857598	7.48699e-08		65	0.687067	0.0119177	0.0117773	0.625231	0.00964608	8.10379e-08																		43.7757	0.456472	0.000276686	0.000276609	0.435812	0.0002808	6e-07
85.2	0.900587	0.00252272	0.00251637	0.848264	0.00243575	2.1e-07		0	0	0	0					0	0	0	0																					45.2125	0.471454	0.000310645	0.000310549	0.463963	0.000293579
0	0	0	0					8.6	0.0909043	0.000611345	0.000610972	0.0454521	0.000305486	2.36431e-07		8.2	0.0866762	0.000582733	0.000582394	0.0433381	0.000291197	2.16101e-07																		58.6836	0.611925	0.000375901	0.00037576	0.541689	0.000343154
9.45	0.099889	0.000385838	0.000385689	0.0499445	0.000192845	2.2e-07		25.2	0.266371	0.00193721	0.00193346	0.178637	0.00127222	1.65502e-07		25.3	0.267428	0.00196097	0.00195714	0.177052	0.00126977	2.02595e-07																		59.8788	0.624388	0.000336736	0.000336623	0.618156	0.000356191	6e-07
32.05	0.338777	0.0011875	0.00118609	0.219333	0.000785889	2.1e-07		48.25	0.510015	0.00471983	0.00469766	0.388193	0.00331556	1.18216e-07		47.85	0.505787	0.00548358	0.00545368	0.386607	0.00370541	1.75582e-07
56.2	0.594049	0.00191224	0.00190859	0.466413	0.00154734	2.2e-07		64.1	0.677554	0.00915803	0.00907492	0.593785	0.00688629	7.09294e-08		65	0.687067	0.0106805	0.0105676	0.596427	0.00801065	8.10379e-08
75.5	0.798055	0.00231787	0.00231251	0.696052	0.00211055	2.2e-07		69.5	0.734633	0.0131335	0.0129632	0.706094	0.0110191	4.72863e-08		70.1	0.740976	0.0147671	0.0145522	0.714021	0.0125599	6.75316e-08
0	0	0	0
9.1	0.0961894	0.000339683	0.000339568	0.0480947	0.000169784	2.2e-07
23.7	0.250515	0.000833825	0.00083313	0.173352	0.000586349	2.2e-07
43.7	0.461921	0.00151021	0.00150793	0.356218	0.00117053	2.2e-07
59.45	0.628402	0.00194296	0.0019392	0.545161	0.00172356	2.2e-07
72.15	0.762645	0.00223844	0.00223344	0.695523	0.00208632	2.2e-07

## Sheet: 55°C
PS387k - custom								SEO92k - cylindrical								SEO122k - lamellar								PS77k - Polymer Source								PS160k - Polymer Source								PS109k - Versalis
p	a	W	w	<a>	<w>	D		p	a	W	w	<a>	<w>	D		p	a	W	w	<a>	<w>	D		p	a	W	w	<a>	<w>	D		p	a	W	w	<a>	<w>	D		p	a	W	w	<a>	<w>	D
mbar		g/gpol				cm2/s		mbar		g/gpol				cm2/s		mbar		g/gpol				cm2/s		mbar		g/gpol				cm2/s		mbar		g/gpol				cm2/s		mbar		g/gpol				cm2/s
0	0	0	0					0	0	0	0					0	0	0	0					0	0	0	0					0	0	0	0					0	0	0	0
16.05	0.103375	0.00035112	0.000350996	0.0516875	0.000175498	3.5e-07		13.8	0.0888832	0.000599193	0.000598834	0.0444416	0.000299417	4.72863e-07		13.05	0.0840526	0.00063564	0.000635236	0.0420263	0.000317618	4.0519e-07		13.1397	0.0834901	0.000285967	0.000285885	0.0417451	0.000142942	8e-08		13.8021	0.087699	0.000274413	0.000274338	0.0438495	0.000137169	1e-07		9.38086	0.0596368	9.3729e-05	9.37203e-05	0.0298184	4.68601e-05	5.5e-07
42.25	0.272124	0.000887773	0.000886985	0.18775	0.000618991	3.5e-07		35.25	0.227039	0.00165999	0.00165724	0.157961	0.00112803	3.15242e-07		34.85	0.224462	0.00187149	0.00186799	0.154257	0.00125162	3.78177e-07		27.4216	0.174238	0.000518811	0.000518542	0.128864	0.000402213	8e-08		29.3753	0.186652	0.000484792	0.000484557	0.137176	0.000379447	1.1e-07		12.4539	0.0791728	9.45095e-05	9.45006e-05	0.0694048	9.41104e-05	5.5e-07
70.6	0.454721	0.0014601	0.00145798	0.363423	0.00117248	3.4e-07		57.3	0.369058	0.00327579	0.00326509	0.298048	0.00246116	2.36431e-07		59.2	0.381296	0.00409138	0.00407471	0.302879	0.00297135	3.24152e-07		53.0687	0.337201	0.000836204	0.000835505	0.25572	0.000677024	8e-08		56.4396	0.35862	0.000805694	0.000805045	0.272636	0.000644801	1.1e-07		27.3826	0.174079	0.000193969	0.000193932	0.126626	0.000144216	6e-07
99.75	0.642471	0.00200849	0.00200447	0.548596	0.00173122	3.3e-07		76.5	0.492722	0.00609535	0.00605842	0.43089	0.00466176	1.77323e-07		78	0.502383	0.00770897	0.00764999	0.441839	0.00586235	2.5662e-07		0	0	0	0					0	0	0	0					31.8792	0.202665	0.000208526	0.000208482	0.188372	0.000201207	6.5e-07
130.5	0.840526	0.00240397	0.0023982	0.741498	0.00220133	3.3e-07		85.9	0.553265	0.00984705	0.00975103	0.522994	0.00790473	1.4974e-07		88.8	0.571944	0.0125942	0.0124376	0.537163	0.0100438	2.43114e-07		13.4667	0.0855681	0.000150667	0.000150644	0.042784	7.5322e-05	7e-08		14.314	0.0909518	0.000188449	0.000188413	0.0454759	9.42066e-05	1e-07		45.6471	0.290192	0.00027806	0.000277983	0.246428	0.000243233	6e-07
0	0	0	0					94.6	0.609301	0.0178615	0.0175481	0.581283	0.0136496	1.18216e-07		97.7	0.629267	0.0201108	0.0197143	0.600605	0.0160759	2.16101e-07		32.7651	0.208191	0.00042235	0.000422171	0.14688	0.000286408	3.5e-08		35.1509	0.223351	0.000438182	0.00043799	0.157151	0.000313202	8e-08		48.6607	0.309349	0.000291108	0.000291024	0.299771	0.000284503	7e-07
13.4	0.0863068	0.000308007	0.000307912	0.0431534	0.000153956	3.5e-07		103.9	0.6692	0.0264973	0.0258133	0.63925	0.0216807	8.66915e-08		105.1	0.676929	0.0288143	0.0280073	0.653098	0.0238608	9.45442e-08		55.4335	0.352227	0.000726832	0.000726304	0.280209	0.000574238	5e-08		58.7644	0.373392	0.000701202	0.000700711	0.298371	0.00056935	5e-08		64.8525	0.412286	0.0003746	0.00037446	0.360817	0.000332742	8e-07
34.85	0.224462	0.000736954	0.000736411	0.155385	0.000522161	3.5e-07		0	0	0	0					0	0	0	0					79.2505	0.503561	0.000939354	0.000938473	0.427894	0.000832388	7e-08		83.9907	0.533681	0.000875701	0.000874935	0.453536	0.000787823	1.1e-07		65.0922	0.41381	0.00035153	0.000351407	0.413048	0.000362933	6e-07
60.8	0.391601	0.001239	0.00123746	0.308032	0.000986937	3.4e-07		13.8	0.0888832	0.000775832	0.00077523	0.0444416	0.000387615	3.94052e-07		14.45	0.0930697	0.000456253	0.000456045	0.0465348	0.000228023	3.78177e-07		103.583	0.658174	0.00110803	0.0011068	0.580868	0.00102264	3e-09		108.005	0.686272	0.0010525	0.00105139	0.609976	0.000963164	4e-08		80.8198	0.513794	0.000439402	0.000439209	0.463802	0.000395308	1e-06
83.8	0.53974	0.00166751	0.00166474	0.46567	0.0014511	3.3e-07		35.6	0.229293	0.00231801	0.00231264	0.159088	0.00154394	3.07361e-07		35.5	0.228649	0.00188835	0.00188479	0.160859	0.00117042	3.51164e-07																		82.6654	0.525527	0.000416823	0.00041665	0.519661	0.00042793	6e-07
107.7	0.693675	0.00206987	0.00206559	0.616707	0.00186516	3.3e-07		60.1	0.387093	0.00449933	0.00447918	0.308193	0.00339591	2.16729e-07		60.2	0.387737	0.00438275	0.00436362	0.308193	0.00312421	3.24152e-07																		96.2726	0.612032	0.000487142	0.000486905	0.56878	0.000451777	9e-07
								80.9	0.521061	0.00913257	0.00904992	0.454077	0.00676455	1.45799e-07		84.1	0.541672	0.00978148	0.00968673	0.464704	0.00702518	2.5662e-07																		102.8	0.653528	0.000489426	0.000489187	0.63278	0.000488046	6e-07
								95.85	0.617352	0.0188774	0.0185276	0.569206	0.0137888	1.06394e-07		98.2	0.632487	0.0194736	0.0191017	0.58708	0.0143942	2.16101e-07
								0	0	0	0					0	0	0	0
								9.5	0.0611877	0.000442674	0.000442479	0.0305938	0.000221239	4.13755e-07		9.95	0.064086	0.000480944	0.000480713	0.032043	0.000240357	3.10645e-07
								23.5	0.151359	0.00112138	0.00112012	0.106273	0.0007813	3.15242e-07		24.35	0.156834	0.00131637	0.00131463	0.11046	0.000897674	2.83633e-07
								40.55	0.261175	0.00219934	0.00219451	0.206267	0.00165732	2.44312e-07		40.6	0.261497	0.00250893	0.00250265	0.209165	0.00190864	2.43114e-07
								57.4	0.369702	0.00388226	0.00386725	0.315439	0.00303088	1.77323e-07		57.4	0.369702	0.00434428	0.00432549	0.3156	0.00341407	2.43114e-07
								71.5	0.460518	0.00631558	0.00627595	0.41511	0.0050716	1.37918e-07		72.4	0.466315	0.0074451	0.00739008	0.418009	0.00585778	2.43114e-07
								82.9	0.533943	0.0105827	0.0104719	0.49723	0.00837391	1.26097e-07		84.6	0.544892	0.0119796	0.0118378	0.505604	0.00961392	2.29607e-07
								92.3	0.594487	0.017087	0.0168	0.564215	0.0136359	9.8513e-08		96.7	0.622826	0.0183784	0.0180468	0.583859	0.0149423	2.16101e-07
								101.8	0.655674	0.0243892	0.0238085	0.625081	0.0203042	7.09294e-08		103.1	0.664047	0.0268763	0.0261729	0.643437	0.0221098	1.75582e-07
								110.9	0.714286	0.0311348	0.0301947	0.68498	0.0270016	5.91078e-08		109.9	0.707845	0.0362976	0.0350263	0.685946	0.0305996	9.45442e-08
								116.5	0.750354	0.0368792	0.0355675	0.73232	0.0328811	5.12268e-08		122.2	0.787067	0.0580197	0.054838	0.747456	0.0449322
								0	0	0	0					0	0	0	0
								59.6	0.383872	0.00482311	0.00479996	0.191936	0.00239998	1.97026e-07		63.5	0.408991	0.00550547	0.00547533	0.204496	0.00273766	2.97139e-07
								88.6	0.570656	0.0133934	0.0132164	0.477264	0.00900816	9.8513e-08		92	0.592554	0.0137041	0.0135189	0.500773	0.0094971	2.70126e-07
								0	0	0	0					0	0	0	0
								46.3	0.298209	0.00275198	0.00274443	0.149105	0.00137222	2.56134e-07		49.9	0.321396	0.00361172	0.00359872	0.160698	0.00179936	3.10645e-07
								84	0.541028	0.00994546	0.00984752	0.419619	0.00629597	1.57621e-07		87.9	0.566147	0.011599	0.011466	0.443772	0.00753237	2.83633e-07
								96.1	0.618962	0.0183696	0.0180382	0.579995	0.0139429	9.0632e-08		99.6	0.641505	0.020081	0.0196856	0.603826	0.0155758	2.02595e-07
								104.7	0.674353	0.0254979	0.0248639	0.646657	0.0214511	7.48699e-08		105.6	0.680149	0.0279202	0.0271618	0.660827	0.0234237	1.4857e-07

## Sheet: 65°C
PS387k - custom								SEO92k - cylindrical								SEO122k - lamellar								PS77k - Polymer Source								PS160k - Polymer Source								PS109k - Versalis
p	a	W	w	<a>	<w>	D		p	a	W	w	<a>	<w>	D		p	a	W	w	<a>	<w>	D		p	a	W	w	<a>	<w>	D		p	a	W	w	<a>	<w>	D		p	a	W	w	<a>	<w>	D
mbar		g/gpol				cm2/s		mbar		g/gpol				cm2/s		mbar		g/gpol				cm2/s		mbar		g/gpol				cm2/s		mbar		g/gpol				cm2/s		mbar		g/gpol				cm2/s
0	0	0	0					0	0	0	0					0	0	0	0																					0	0	0	0
23.35	0.0989742	0.000333353	0.000333242	0.0494871	0.000166621	5.1e-07		41.3	0.175059	0.00242721	0.00242133	0.0875297	0.00121067	3.94052e-07		41.2	0.174635	0.00291731	0.00290883	0.0873177	0.00145441	7.02329e-07																		14.7133	0.0588016	9.06902e-05	9.0682e-05	0.0294008	4.5341e-05	7.5e-07
56.35	0.238852	0.000767585	0.000766996	0.168913	0.000550119	5.1e-07		79.6	0.337403	0.00649682	0.00645488	0.256231	0.00443811	2.75836e-07		76.7	0.32511	0.00762968	0.00757191	0.249873	0.00524037	6.75316e-07																		34.2425	0.13697	0.000190498	0.000190462	0.0978858	0.000140572	8e-07
112.6	0.47728	0.00144738	0.00144529	0.358066	0.00110614	4.7e-07		0	0	0	0					0	0	0	0																					43.4908	0.17381	0.000194662	0.000194624	0.15539	0.000192543	8e-07
154.45	0.654671	0.00197575	0.00197185	0.565976	0.00170857	4.5e-07		16.05	0.0680315	0.0010174	0.00101637	0.0340158	0.000508183	4.33457e-07		15	0.0635809	0.00121015	0.00120868	0.0317904	0.000604342	8.10379e-07																		66.2759	0.265104	0.000317761	0.000317661	0.219457	0.000256142	8e-07
188.35	0.798364	0.00238459	0.00237892	0.726517	0.00217539	4.8e-07		42.85	0.181629	0.00283592	0.0028279	0.12483	0.00192213	3.54647e-07		41.7	0.176755	0.00359157	0.00357872	0.120168	0.0023937	6.75316e-07																		70.6034	0.282165	0.000302686	0.000302594	0.273635	0.000310127	9.5e-07
0	0	0	0					66.65	0.282511	0.00491124	0.00488723	0.23207	0.00385757	2.95539e-07		65.5	0.277636	0.00637679	0.00633639	0.227196	0.00495755	5.40253e-07																		95.5925	0.382034	0.00038479	0.000384642	0.3321	0.000343618	8.5e-07
12	0.0508647	0.000215137	0.000215091	0.0254323	0.000107546	5.3e-07		98.4	0.417091	0.00850016	0.00842852	0.349801	0.00665787	1.97026e-07		96.7	0.409885	0.0110775	0.0109561	0.343761	0.00864624	3.51164e-07																		95.8055	0.383222	0.000420136	0.000419959	0.382628	0.000402301	8.5e-07
36.75	0.155773	0.00054231	0.000542016	0.103319	0.000378554	5.3e-07		118.8	0.503561	0.0117422	0.0116059	0.460326	0.0100172	1.69442e-07		117	0.495931	0.0153259	0.0150945	0.452908	0.0130253	2.70126e-07																		128.25	0.513	0.00052311	0.000522836	0.448111	0.000471398	9e-07
68.3	0.289505	0.000914845	0.000914009	0.222639	0.000728013	5.3e-07		136.5	0.578586	0.0155924	0.015353	0.541073	0.0134794	1.37918e-07		134	0.567989	0.0199436	0.0195536	0.53196	0.0173241	1.89088e-07																		130.061	0.519785	0.000492031	0.000491789	0.516393	0.000507313	1.1e-06
120.9	0.512462	0.0014964	0.00149417	0.400983	0.00120409	4.5e-07		173.6	0.735843	0.0322694	0.0312607	0.657214	0.0233068	7.88104e-08		167.7	0.710834	0.0327019	0.0316664	0.639412	0.02561	7.56354e-08																		159.255	0.63646	0.000589041	0.000588695	0.578123	0.000540242	1e-06
								0	0	0	0					0	0	0	0
								22.8	0.0966429	0.00143954	0.00143747	0.0483215	0.000718735	4.33457e-07		22.7	0.0962191	0.00182491	0.00182158	0.0481095	0.000910791	8.91417e-07
								0	0	0	0					0	0	0	0	0.0481095	0.000910791
								39.9	0.169125	0.00248705	0.00248088	0.0845626	0.00124044	3.54647e-07		38.6	0.163615	0.00310887	0.00309924	0.0818074	0.00154962	8.10379e-07
								84.2	0.356901	0.00654304	0.00650051	0.263013	0.00449069	2.2855e-07		81.1	0.343761	0.00808464	0.0080198	0.253688	0.00555952	6.75316e-07
								100.7	0.42684	0.00875897	0.00868291	0.39187	0.00759171	1.97026e-07		99.1	0.420058	0.0110274	0.0109071	0.381909	0.00946345	3.78177e-07
								126.4	0.535775	0.0132243	0.0130517	0.481307	0.0108673	1.37918e-07		124.1	0.526026	0.01635	0.0160869	0.473042	0.013497	2.29607e-07
								148.6	0.629875	0.0188177	0.0184702	0.582825	0.0157609	1.37918e-07		144.9	0.614191	0.0225727	0.0220745	0.570109	0.0190807	1.4857e-07

## Sheet: 75°C
PS387k - custom								SEO92k - cylindrical								SEO122k - lamellar								PS77k - Polymer Source								PS160k - Polymer Source								PS109k - Versalis
p	a	W	w	<a>	<w>	D		p	a	W	w	<a>	<w>	D		p	a	W	w	<a>	<w>	D		p	a	W	w	<a>	<w>	D		p	a	W	w	<a>	<w>	D		p	a	W	w	<a>	<w>	D
mbar		g/gpol				cm2/s		mbar		g/gpol				cm2/s		mbar		g/gpol				cm2/s		mbar		g/gpol				cm2/s		mbar		g/gpol				cm2/s		mbar		g/gpol				cm2/s
0	0	0	0					0	0	0	0					0	0	0	0					0	0	0	0					0	0	0	0
36.15	0.095034	0.000312161	0.000312064	0.047517	0.000156032	7.5e-07		19.5	0.0512632	0.000779045	0.000778438	0.0256316	0.000389219	5.51673e-07		20.4	0.0536292	0.00106964	0.0010685	0.0268146	0.000534248	1.21557e-06		33.95	0.0880423	0.000288726	0.000288642	0.0440212	0.000144321	1.3e-07		40.2993	0.104508	0.000279643	0.000279565	0.052254	0.000139783	1.5e-07
94.45	0.248298	0.000758917	0.000758341	0.171666	0.000535202	7.5e-07		51	0.134073	0.00204497	0.0020408	0.0926681	0.00140962	5.3197e-07		48.1	0.126449	0.00254871	0.00254223	0.0900392	0.00180536	1.08051e-06		81.5028	0.211361	0.000605677	0.000605311	0.149702	0.000446976	1.3e-07		88.4887	0.229477	0.00055096	0.000550657	0.166993	0.000415111	1.5e-07
186.95	0.491469	0.00154872	0.00154633	0.369884	0.00115233	7.2e-07		0	0	0	0					0	0	0	0					136.457	0.353874	0.000845131	0.000844417	0.282617	0.000724864	1e-07		143.411	0.371906	0.000684416	0.000683947	0.300692	0.000617302	1.5e-07
265.3	0.697442	0.00210176	0.00209735	0.594456	0.00182184	6.5e-07		49.7	0.130655	0.00191164	0.00190799	0.0653277	0.000953997	5.51673e-07		48.2	0.126712	0.00264885	0.00264186	0.063356	0.00132093	1.08051e-06		195.43	0.506806	0.00119979	0.00119835	0.43034	0.00102139	1.3e-07		203.082	0.526652	0.000870964	0.000870206	0.449279	0.000777077	1.5e-07
319.8	0.840716	0.00238808	0.00238239	0.769079	0.00223987	6.8e-07		91.6	0.240805	0.00339789	0.00338639	0.18573	0.00264719	4.33457e-07		90.7	0.238439	0.00544074	0.00541129	0.182576	0.00402658	6.21291e-07		240.55	0.623817	0.00148922	0.00148701	0.565312	0.00134268	1.8e-07		243.934	0.632591	0.00111559	0.00111435	0.579622	0.000992278	1.7e-07
0	0	0	0					152.2	0.400116	0.00776367	0.00770386	0.320461	0.00554513	3.15242e-07		152	0.39959	0.0109229	0.0108049	0.319015	0.00810809	3.51164e-07		0	0	0	0					0	0	0	0
52.15	0.137096	0.000408293	0.000408126	0.0685481	0.000204063	8e-07		189.4	0.49791	0.0116996	0.0115643	0.449013	0.00963409	2.2855e-07		191	0.502116	0.0164134	0.0161483	0.450853	0.0134766	2.70126e-07		35.3139	0.0915794	0.000244093	0.000244033	0.0457897	0.000122016	1.3e-07		36.8507	0.0955647	0.000206339	0.000206296	0.0477824	0.000103148	1.7e-07
131.3	0.345172	0.0010444	0.00104331	0.241134	0.000725716	7.7e-07		234.4	0.61621	0.0187248	0.0183806	0.55706	0.0149725	1.69442e-07		233.5	0.613844	0.0244765	0.0238917	0.55798	0.02002	1.62076e-07		83.4544	0.216422	0.000476583	0.000476356	0.154001	0.000360195	1.1e-07		85.2065	0.220966	0.000430484	0.000430299	0.158265	0.000318297	1.7e-07
224.5	0.590184	0.00173802	0.001735	0.467678	0.00138915	7.2e-07		266.3	0.700071	0.0268003	0.0261008	0.65814	0.0222407	1.37918e-07		265	0.696653	0.0361629	0.0349008	0.655249	0.0293963	1.08051e-07		137.09	0.355515	0.000884492	0.00088371	0.285969	0.000680033	1.5e-07		141.595	0.367198	0.000624834	0.000624444	0.294082	0.000527371	1.9e-07
291.85	0.767239	0.00222424	0.0022193	0.678711	0.00197715	6.5e-07		0	0	0	0					0	0	0	0					194.005	0.503112	0.00117344	0.00117207	0.429314	0.00102789	1.3e-07		200.957	0.521141	0.000789426	0.000788803	0.44417	0.000706624	3e-07
								49	0.128815	0.00194764	0.00194385	0.0644076	0.000971927	5.3197e-07		60.3	0.158522	0.00320329	0.00319307	0.0792608	0.00159653	1.05349e-06		249.202	0.646254	0.00158042	0.00157793	0.574683	0.001375	1e-07		242.502	0.62888	0.000977665	0.00097671	0.575011	0.000882756	3e-07
								125.8	0.330713	0.00615421	0.00611657	0.229764	0.00403021	3.34944e-07		124.7	0.327821	0.00806775	0.00800318	0.243171	0.00559812	5.94278e-07
								191	0.502116	0.0122437	0.0120956	0.416415	0.00910607	2.16729e-07		189.4	0.49791	0.0154131	0.0151791	0.412866	0.0115912	2.97139e-07
								233	0.612529	0.0188246	0.0184768	0.557323	0.0152862	1.57621e-07		228.6	0.600962	0.0226309	0.0221301	0.549436	0.0186546	1.89088e-07
								259.6	0.682457	0.0256425	0.0250014	0.647493	0.0217391	1.18216e-07		256.1	0.673256	0.0311779	0.0302352	0.637109	0.0261826	1.35063e-07
								278.4	0.73188	0.0307169	0.0298015	0.707169	0.0274014	1.26097e-07
								0	0	0	0					0	0	0	0
								110	0.289177	0.00504813	0.00502277	0.144588	0.00251139	3.54647e-07		110.9	0.291543	0.00689007	0.00684292	0.145771	0.00342146	7.56354e-07
								208.2	0.547333	0.0152202	0.014992	0.418255	0.0100074	2.16729e-07		209	0.549436	0.0214741	0.0210226	0.420489	0.0139328	2.5662e-07
								279.8	0.735561	0.0267324	0.0260364	0.641447	0.0205142	1.18216e-07		261	0.686138	0.0344918	0.0333418	0.617787	0.0271822	1.21557e-07
								281.1	0.738978	0.0345937	0.033437	0.73727	0.0297367	1.26097e-07		279.3	0.734246	0.0439275	0.0420791	0.710192	0.0377104	9.45442e-08
								295.3	0.776309	0.0422732	0.0405587	0.757643	0.0369978	7.88104e-08		294.5	0.774205	0.0542306	0.0514409	0.754226	0.04676	8.10379e-08

## Sheet: PS387k
	PS387k
T	1000/T	Davg		StDev	%Error			Ea,D	36.1159	kJ/mol
°C	K-1	cm2/s
35	3.24517	1.46667e-07		7.07107e-09	0.0482118
45	3.14317	2.13889e-07		6.07685e-09	0.0284112
55	3.04739	3.4e-07		9.42809e-09	0.0277297
65	2.95727	4.95556e-07		3.35824e-08	0.0677672
75	2.87233	7.3e-07		4.84031e-08	0.0663056
35°C				45°C				55°C				65°C				75°C
<a>	<w>	D		<a>	<w>	D		<a>	<w>	D		<a>	<w>	D		<a>	<w>	D
0.0739882	0.000260342	1.5e-07		0.0208763	8.69959e-05	2e-07		0.0516875	0.000175498	3.5e-07		0.0494871	0.000166621	5.1e-07		0.047517	0.000156032	7.5e-07
0.24737	0.000834129	1.4e-07		0.0866762	0.000325113	2.1e-07		0.18775	0.000618991	3.5e-07		0.168913	0.000550119	5.1e-07		0.171666	0.000535202	7.5e-07
0.447495	0.00142771	1.4e-07		0.181809	0.000641284	2.1e-07		0.363423	0.00117248	3.4e-07		0.358066	0.00110614	4.7e-07		0.369884	0.00115233	7.2e-07
0.648066	0.00191352	1.4e-07		0.286454	0.00098121	2.1e-07		0.548596	0.00173122	3.3e-07		0.565976	0.00170857	4.5e-07		0.594456	0.00182184	6.5e-07
0.0392227	0.000132183	1.6e-07		0.390043	0.00131049	2.1e-07		0.741498	0.00220133	3.3e-07		0.726517	0.00217539	4.8e-07		0.769079	0.00223987	6.8e-07
0.154216	0.000495931	1.5e-07		0.49416	0.00162887	2.1e-07		0.0431534	0.000153956	3.5e-07		0.0254323	0.000107546	5.3e-07		0.0685481	0.000204063	8e-07
0.307987	0.000964103	1.5e-07		0.608847	0.00195915	2.1e-07		0.155385	0.000522161	3.5e-07		0.103319	0.000378554	5.3e-07		0.241134	0.000725716	7.7e-07
0.480032	0.00145195	1.5e-07		0.732255	0.00224029	2.1e-07		0.308032	0.000986937	3.4e-07		0.222639	0.000728013	5.3e-07		0.467678	0.00138915	7.2e-07
0.679265	0.00191818	1.4e-07		0.848264	0.00243575	2.1e-07		0.46567	0.0014511	3.3e-07		0.400983	0.00120409	4.5e-07
				0.0499445	0.000192845	2.2e-07		0.616707	0.00186516	3.3e-07
				0.219333	0.000785889	2.1e-07
				0.466413	0.00154734	2.2e-07
				0.696052	0.00211055	2.2e-07
				0.0480947	0.000169784	2.2e-07
				0.173352	0.000586349	2.2e-07
				0.356218	0.00117053	2.2e-07
				0.545161	0.00172356	2.2e-07
				0.695523	0.00208632	2.2e-07

## Sheet: SEO92k
	SEO - cylindrical
		activity based		activity (low RH)		conc (low w)		conc. based
T	1000/T	D0	bD	D0	bD	D0	bD	D0	bD					Ea,D	25.6436	kJ/mol	conc. based
K	K-1	cm2/s		cm2/s		cm2/s		cm2/s							25.5198	kJ/mol	activity based
35	3.24517	1.68166e-07	-1.94608	1.71005e-07	-2.09673	1.59329e-07	-203.73	1.53339e-07	-173.213						27.2866	kJ/mol	activity (low RH)
45	3.14317	2.65905e-07	-2.15902	2.4222e-07	-1.34199	2.39174e-07	-184.956	2.24763e-07	-147.063						29.1594	kJ/mol	conc (low w)
55	3.04739	4.55109e-07	-2.71423	4.92498e-07	-3.73602	4.11208e-07	-234.798	2.7373e-07	-62.097
65	2.95727	4.7892e-07	-2.42092	4.56587e-07	-1.94913	4.5576e-07	-129.065	3.87207e-07	-74.8155
75	2.87233	5.14476e-07	-1.97545	5.66475e-07	-2.63989	5.85745e-07	-125.665	4.91293e-07	-69.3088
35°C				45°C				55°C				65°C				75°C
<a>	<w>	D		<a>	<w>	D		<a>	<w>	D		<a>	<w>	D		<a>	<w>	D
0.0240685	0.000128667	1.77323e-07		0.0269542	0.000199111	2.16729e-07		0.0305938	0.000221239	4.13755e-07		0.0340158	0.000508183	4.33457e-07		0	0.000953997	5.51673e-07
0.0383313	0.000264902	1.57621e-07		0.0364674	0.000272023	2.56134e-07		0.0444416	0.000299417	4.72863e-07		0.0483215	0.000718735	4.33457e-07		0.0256316	0.000389219	5.51673e-07
0.0481369	0.000351205	1.57621e-07		0.0454521	0.000305486	2.36431e-07		0.0444416	0.000387615	3.94052e-07		0.0845626	0.00124044	3.54647e-07		0.0653277	0.00264719	4.33457e-07
0.134605	0.00093525	1.18216e-07		0.137413	0.00100992	1.97026e-07		0.106273	0.0007813	3.15242e-07		0.0875297	0.00121067	3.94052e-07		0.0926681	0.00140962	5.3197e-07
0.145748	0.00110131	1.18216e-07		0.178637	0.00127222	1.65502e-07		0.149105	0.00137222	2.56134e-07		0.12483	0.00192213	3.54647e-07		0.144588	0.00251139	3.54647e-07
0.156891	0.00113974	1.18216e-07		0.256329	0.00194976	1.89145e-07		0.157961	0.00112803	3.15242e-07		0.23207	0.00385757	2.95539e-07		0.18573	0.00554513	3.15242e-07
0.282582	0.00216562	9.8513e-08		0.382644	0.00331586	1.18216e-07		0.159088	0.00154394	3.07361e-07		0.256231	0.00443811	2.75836e-07		0.229764	0.00403021	3.34944e-07
0.284364	0.00225633	9.8513e-08		0.388193	0.00331556	1.18216e-07		0.191936	0.00239998	1.97026e-07		0.263013	0.00449069	2.2855e-07		0.320461	0.00963409	2.2855e-07
0.402478	0.00358226	7.48699e-08		0.50843	0.00530819	9.8513e-08		0.206267	0.00165732	2.44312e-07		0.349801	0.00665787	1.97026e-07		0.416415	0.00910607	2.16729e-07
0.480478	0.00444945	7.09294e-08		0.593785	0.00688629	7.09294e-08		0.298048	0.00246116	2.36431e-07		0.39187	0.00759171	1.97026e-07		0.418255	0.0100074	2.16729e-07
0.577643	0.0062518	5.51673e-08		0.632102	0.00857598	7.48699e-08		0.308193	0.00339591	2.16729e-07		0.460326	0.0100172	1.69442e-07		0.449013	0.0149725	1.69442e-07
0.640934	0.00711445	4.72863e-08		0.706094	0.0110191	4.72863e-08		0.315439	0.00303088	1.77323e-07		0.481307	0.0108673	1.37918e-07		0.55706	0.0222407	1.37918e-07
								0.41511	0.0050716	1.37918e-07		0.541073	0.0134794	1.37918e-07		0.557323	0.0152862	1.57621e-07
								0.419619	0.00629597	1.57621e-07		0.582825	0.0157609	1.37918e-07		0.641447	0.0205142	1.18216e-07
								0.43089	0.00466176	1.77323e-07		0.657214	0.0233068	7.88104e-08		0.647493	0.0217391	1.18216e-07
								0.454077	0.00676455	1.45799e-07						0.65814	0.000971927	5.3197e-07
								0.477264	0.00900816	9.8513e-08						0.707169	0.0274014	1.26097e-07
								0.49723	0.00837391	1.26097e-07						0.73727	0.0297367	1.26097e-07
								0.522994	0.00790473	1.4974e-07						0.757643	0.0369978	7.88104e-08
								0.564215	0.0136359	9.8513e-08
								0.569206	0.0137888	1.06394e-07
								0.579995	0.0139429	9.0632e-08
								0.581283	0.0136496	1.18216e-07
								0.625081	0.0203042	7.09294e-08
								0.63925	0.0216807	8.66915e-08
								0.646657	0.0214511	7.48699e-08
								0.68498	0.0270016	5.91078e-08
								0.73232	0.0328811	5.12268e-08

## Sheet: SEO122k
	SEO - lamellar
		activity based		activity (low RH)		conc (low w)		conc. based
T	1000/T	D0	bD	D0	bD	D0	bD	D0	bD					Ea,D	44.4381	kJ/mol	conc. based
K	K-1	cm2/s		cm2/s		cm2/s		cm2/s							52.9749	kJ/mol	conc. based
35	3.24517	1.46431e-07	-1.40432	1.38039e-07	-1.08302	1.44723e-07	-156.39	1.39318e-07	-128.848						53.0488	kJ/mol	activity (low RH)
45	3.14317	2.63269e-07	-1.67692	2.25627e-07	-0.575715	2.2437e-07	-72.9015	2.33077e-07	-104.675						52.8453	kJ/mol	conc (low w)
55	3.04739	4.12322e-07	-1.37113	3.82537e-07	-1.33156	3.59732e-07	-76.669	3.43977e-07	-38.9383
65	2.95727	1.14593e-06	-3.48954	8.71251e-07	-1.56558	8.96424e-07	-104.549	9.21369e-07	-95.9428
75	2.87233	1.36573e-06	-3.77436	1.38254e-06	-3.77968	1.41404e-06	-191.398	8.4002e-07	-63.9687
35°C				45°C				55°C				65°C					75°C
<a>	<w>	D		<a>	<w>	D		<a>	<w>	D		<a>	<w>	D		<a>	<w>	D
0	9.99075e-05	1.4857e-07		0.0274827	0.00018196	2.29607e-07		0.032043	0.000240357	3.10645e-07		0.0317904	0.000604342	8.10379e-07		0.0268146	0.000534248	1.21557e-06
0.0196113	0.00113859	1.29661e-07		0.038053	0.000249439	2.16101e-07		0.0420263	0.000317618	4.0519e-07		0.0481095	0.000910791	8.91417e-07		0.063356	0.00132093	1.08051e-06
0.0534855	0.000304391	1.21557e-07		0.0433381	0.000291197	2.16101e-07		0.0465348	0.000228023	3.78177e-07		0.0818074	0.00154962	8.10379e-07		0.0792608	0.00159653	1.05349e-06
0.150651	0.00101599	1.29661e-07		0.138735	0.000947598	2.10699e-07		0.11046	0.000897674	2.83633e-07		0.0873177	0.00145441	7.02329e-07		0.0900392	0.00180536	1.08051e-06
0.167588	0.000979508	1.08051e-07		0.177052	0.00126977	2.02595e-07		0.154257	0.00125162	3.78177e-07		0.120168	0.0023937	6.75316e-07		0.145771	0.00342146	7.56354e-07
0.295062	0.00197834	1.13453e-07		0.258707	0.00196653	1.94491e-07		0.160698	0.00179936	3.10645e-07		0.227196	0.00495755	5.40253e-07		0.182576	0.00402658	6.21291e-07
0.307987	0.00232605	1.16154e-07		0.386607	0.00370541	1.75582e-07		0.160859	0.00117042	3.51164e-07		0.249873	0.00524037	6.75316e-07		0.243171	0.00559812	5.94278e-07
0.438581	0.00375439	7.56354e-08		0.391628	0.00369949	1.67478e-07		0.209165	0.00190864	2.43114e-07		0.253688	0.00555952	6.75316e-07		0.319015	0.00810809	3.51164e-07
0.494295	0.00461017	6.75316e-08		0.5153	0.00618853	1.35063e-07		0.302879	0.00297135	3.24152e-07		0.343761	0.00864624	3.51164e-07		0.412866	0.0115912	2.97139e-07
0.593689	0.00652786	6.48303e-08		0.596427	0.00801065	8.10379e-08		0.308193	0.00312421	3.24152e-07		0.381909	0.00946345	3.78177e-07		0.420489	0.0139328	2.5662e-07
0.649403	0.00756774	5.40253e-08		0.625231	0.00964608	8.10379e-08		0.3156	0.00341407	2.43114e-07		0.452908	0.0130253	2.70126e-07		0.450853	0.0134766	2.70126e-07
				0.714021	0.0125599	6.75316e-08		0.418009	0.00585778	2.43114e-07		0.473042	0.013497	2.29607e-07		0.549436	0.0186546	1.89088e-07
								0.441839	0.00586235	2.5662e-07		0.53196	0.0173241	1.89088e-07		0.55798	0.02002	1.62076e-07
								0.443772	0.00753237	2.83633e-07		0.570109	0.0190807	1.4857e-07		0.617787	0.0271822	1.21557e-07
								0.464704	0.00702518	2.5662e-07		0.639412	0.02561	7.56354e-08		0.637109	0.0261826	1.35063e-07
								0.505604	0.00961392	2.29607e-07						0.655249	0.0293963	1.08051e-07
								0.537163	0.0100438	2.43114e-07						0.710192	0.0377104	9.45442e-08
								0.583859	0.0149423	2.16101e-07						0.754226	0.04676	8.10379e-08
								0.58708	0.0143942	2.16101e-07
								0.600605	0.0160759	2.16101e-07
								0.603826	0.0155758	2.02595e-07
								0.643437	0.0221098	1.75582e-07
								0.653098	0.0238608	9.45442e-08
								0.660827	0.0234237	1.4857e-07
								0.685946	0.0305996	9.45442e-08

## Sheet: PS77k
	PS77k
T	1000/T	Davg		StDev	%Error			Ea,D	21.8292	kJ/mol
K	K-1	cm2/s
35	3.24517	4.78333e-08		3.48807e-09	0.0729214
55	3.04739	5.85e-08		2.76612e-08	0.472841
75	2.87233	1.29e-07		2.37814e-08	0.184352
35°C				45°C				55°C				65°C				75°C
<a>	<w>	D		<a>	<w>	D		<a>	<w>	D		<a>	<w>	D		<a>	<w>	D
0.0625213	0.000169824	4.5e-08						0.0417451	0.000142942	8e-08						0.0440212	0.000144321	1.3e-07
0.226452	0.000517228	5e-08						0.128864	0.000402213	8e-08						0.149702	0.000446976	1.3e-07
0.468627	0.000919903	5e-08						0.25572	0.000677024	8e-08						0.282617	0.000724864	1e-07
																0.43034	0.00102139	1.3e-07
0.0614563	0.000153191	4.2e-08						0.042784	7.5322e-05	7e-08						0.565312	0.00134268	1.8e-07
0.226617	0.000481673	5e-08						0.14688	0.000286408	3.5e-08
0.475593	0.000889014	5e-08						0.280209	0.000574238	5e-08						0.0457897	0.000122016	1.3e-07
								0.427894	0.000832388	7e-08						0.154001	0.000360195	1.1e-07
								0.580868	0.00102264	3e-09						0.285969	0.000680033	1.5e-07
																0.429314	0.00102789	1.3e-07
																0.574683	0.001375	1e-07

## Sheet: PS160k
	PS160k
T	1000/T	Davg		StDev	%Error			Ea,D	25.8104	kJ/mol
K	K-1	cm2/s
35	3.24517	5.91667e-08		4.91596e-09	0.0830867
55	3.04739	8.75e-08		2.81577e-08	0.321803
75	2.87233	1.9e-07		5.94418e-08	0.312852
35°C				45°C				55°C				65°C				75°C
<a>	<w>	D		<a>	<w>	D		<a>	<w>	D		<a>	<w>	D		<a>	<w>	D
0.0609896	0.000159556	5.5e-08						0.0438495	0.000137169	1e-07						0.052254	0.000139783	1.5e-07
0.236692	0.000471888	5.5e-08						0.137176	0.000379447	1.1e-07						0.166993	0.000415111	1.5e-07
0.514909	0.00083701	6.5e-08						0.272636	0.000644801	1.1e-07						0.300692	0.000617302	1.5e-07
																0.449279	0.000777077	1.5e-07
0.0631615	0.000139157	5.5e-08						0.0454759	9.42066e-05	1e-07						0.579622	0.000992278	1.7e-07
0.236537	0.000409921	6e-08						0.157151	0.000313202	8e-08
0.516801	0.000745316	6.5e-08						0.298371	0.00056935	5e-08						0.0477824	0.000103148	1.7e-07
								0.453536	0.000787823	1.1e-07						0.158265	0.000318297	1.7e-07
								0.609976	0.000963164	4e-08						0.294082	0.000527371	1.9e-07
																0.44417	0.000706624	3e-07
																0.575011	0.000882756	3e-07

[truncated: 1 more sheets: PS109k]
